# Supplementary material
Source: PubMed Central journal article supplement (PMC4096285)
Supplement: NIHMS596080-supplement-Supplemental_Data.pdf [file NIHMS596080-supplement-Supplemental_Data.pdf]

## Supplemental Figure I

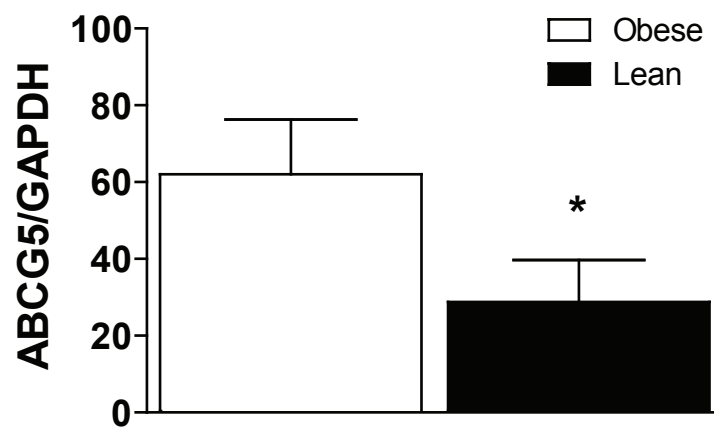

Fig SI. Relative abundance of ABCG5 mRNA in lean and obese mice injected with AdG5G8 adenovirus in liver. \*denotes significant difference at  $p < 0.05$  by unpaired t-test.

## Supplemental Figure II

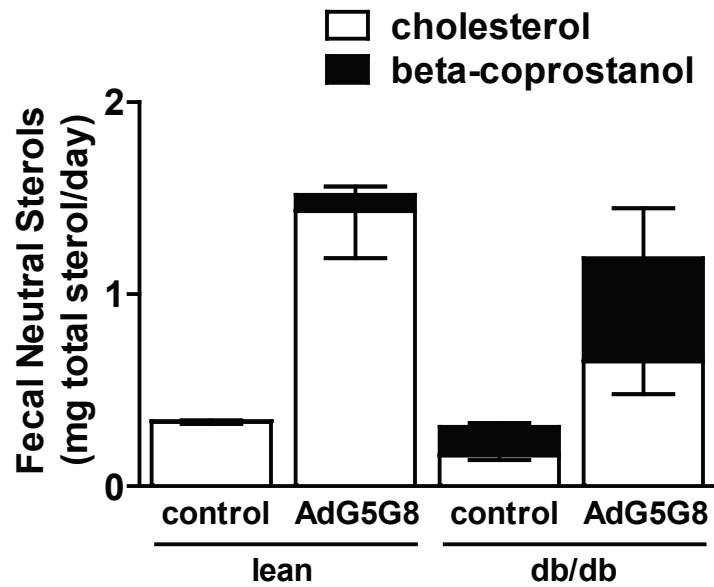

Fig SII. Total fecal neutral sterol output in mice per day. Values are one third of total output over three days. Error bars are SEM for cholesterol (below) and coprostanol (above) component mean.

# Supplemental Figure III.

A

| Layout | 1            | 2             | 3            | 4            | 5            | 6            | 7            | 8            | 9             | 10           | 11           | 12           |
|--------|--------------|---------------|--------------|--------------|--------------|--------------|--------------|--------------|---------------|--------------|--------------|--------------|
| A      | Acaca        | Acox1         | Cfd          | Adra1d       | Aebp1        | Akt1         | Akt2         | Akt3         | Araf          | Bcl2l1       | Braf         | Cap1         |
|        | <b>-3.12</b> | <b>372.22</b> | <b>4.69</b>  | <b>-1.57</b> | <b>-1.52</b> | <b>-1.53</b> | <b>-1.62</b> | <b>-1.21</b> | <b>-1.2</b>   | <b>1.87</b>  | <b>-2.14</b> | <b>1.47</b>  |
|        | OKAY         | OKAY          | A            | B            | OKAY         | OKAY         | OKAY         | OKAY         | OKAY          | OKAY         | OKAY         | OKAY         |
| B      | Cbl          | Cebpa         | Cebpb        | Dok1         | Dok2         | Dok3         | Dusp14       | Eif2b1       | Eif4ebp1      | Ercc1        | Fbp1         | Fos          |
|        | <b>-1.21</b> | <b>-3.89</b>  | <b>1.01</b>  | <b>-1.41</b> | <b>1.1</b>   | <b>-1.34</b> | <b>-1.44</b> | <b>-1.34</b> | <b>1.13</b>   | <b>-1.04</b> | <b>-2.01</b> | <b>1.14</b>  |
|        | OKAY         | OKAY          | OKAY         | OKAY         | OKAY         | OKAY         | OKAY         | OKAY         | OKAY          | OKAY         | OKAY         | OKAY         |
| C      | Mtor         | Frs2          | Frs3         | G6pc         | G6pc2        | Gab1         | Gck          | Gpd1         | Grb2          | Grb10        | Gsk3b        | Hk2          |
|        | <b>-2.81</b> | <b>-1.4</b>   | <b>-1.2</b>  | <b>-2.5</b>  | <b>1.35</b>  | <b>-1.18</b> | <b>-2.57</b> | <b>-2.25</b> | <b>-1.06</b>  | <b>1.17</b>  | <b>-1.43</b> | <b>-1.04</b> |
|        | OKAY         | OKAY          | OKAY         | OKAY         | OKAY         | OKAY         | OKAY         | OKAY         | OKAY          | OKAY         | OKAY         | OKAY         |
| D      | Hras1        | Igf1r         | Igf2         | Igfbp1       | Ins1         | Ins13        | Irs1         | Irs2         | Jun           | Kras         | Ldlr         | Lep          |
|        | <b>-1.47</b> | <b>-1.3</b>   | <b>-3.86</b> | <b>1.22</b>  | <b>-1.84</b> | <b>-2.31</b> | <b>-1.93</b> | <b>-1.47</b> | <b>-1.51</b>  | <b>-1.1</b>  | <b>-1.27</b> | <b>-2.99</b> |
|        | OKAY         | OKAY          | A            | OKAY         | C            | B            | OKAY         | OKAY         | OKAY          | OKAY         | OKAY         | B            |
| E      | Map2k1       | Mapk1         | Nck1         | Nos2         | Npy          | Pck2         | Pdpk1        | Pik3ca       | Pik3cb        | Pik3r1       | Pik3r2       | Pklr         |
|        | <b>1.68</b>  | <b>-1.42</b>  | <b>-1.39</b> | <b>-1.72</b> | <b>3.78</b>  | <b>-1.38</b> | <b>-1.27</b> | <b>-1.26</b> | <b>-1.6</b>   | <b>-1.45</b> | <b>-2.11</b> | <b>-2.73</b> |
|        | OKAY         | OKAY          | OKAY         | OKAY         | A            | OKAY         | OKAY         | OKAY         | OKAY          | OKAY         | OKAY         | OKAY         |
| F      | Pparg        | Ppp1ca        | Prkcc        | Prkci        | Prkcz        | Prl          | Ptpn1        | Ptprf        | Raf1          | Retn         | Rps6ka1      | Rras         |
|        | <b>1.67</b>  | <b>-1.23</b>  | <b>-1.16</b> | <b>-1.19</b> | <b>-1.06</b> | <b>-1.38</b> | <b>-1.12</b> | <b>1.1</b>   | <b>-1.33</b>  | <b>-2.95</b> | <b>-1.25</b> | <b>1.78</b>  |
|        | OKAY         | OKAY          | OKAY         | OKAY         | OKAY         | B            | OKAY         | OKAY         | OKAY          | B            | OKAY         | OKAY         |
| G      | Rras2        | Serpine1      | Shc1         | Slc27a4      | Slc2a1       | Sorbs1       | Sos1         | Srebf1       | Tg            | Klf10        | Ucp1         | Vegfa        |
|        | <b>-3.86</b> | <b>-3.18</b>  | <b>-1.64</b> | <b>-3.41</b> | <b>-2.08</b> | <b>-1.21</b> | <b>-1.37</b> | <b>-2.68</b> | <b>-24.08</b> | <b>-2.57</b> | <b>-1.84</b> | <b>-2.01</b> |
|        | OKAY         | OKAY          | OKAY         | OKAY         | OKAY         | OKAY         | OKAY         | OKAY         | B             | OKAY         | C            | OKAY         |

B

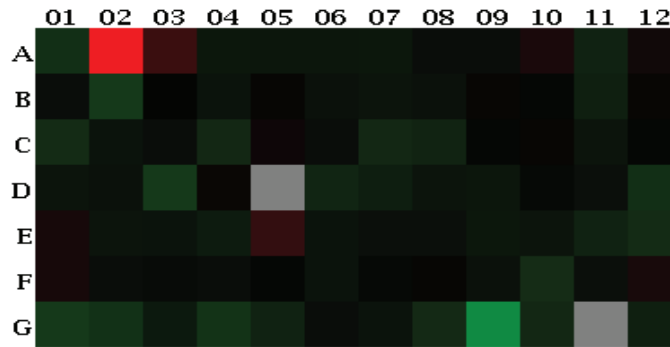

C

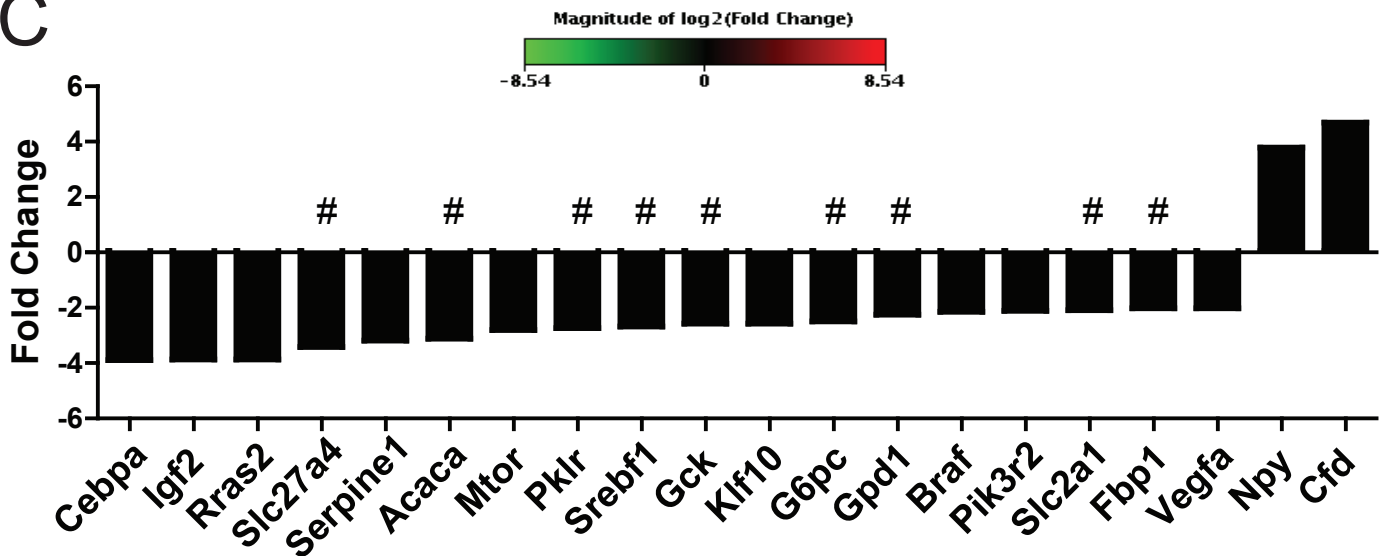

**Figure SIII.** AdG5G8 suppresses insulin signaling genes in obese mice. Total RNA was pooled from three db/db mice administered control virus or AdG5G8 and analyzed by PCR array. A) PCR Array layout with gene symbol, fold change and flags indicated. B) Heat Map of gene expression data. C) Genes with greater than a two-fold difference in abundance in AdG5G8 compared to controls are plotted by fold-change. # above bars indicates confirmation of significant difference by rtPCR in individual mice. Acox1 upregulation could not be confirmed by rtPCR.

## Supplemental Figure IV

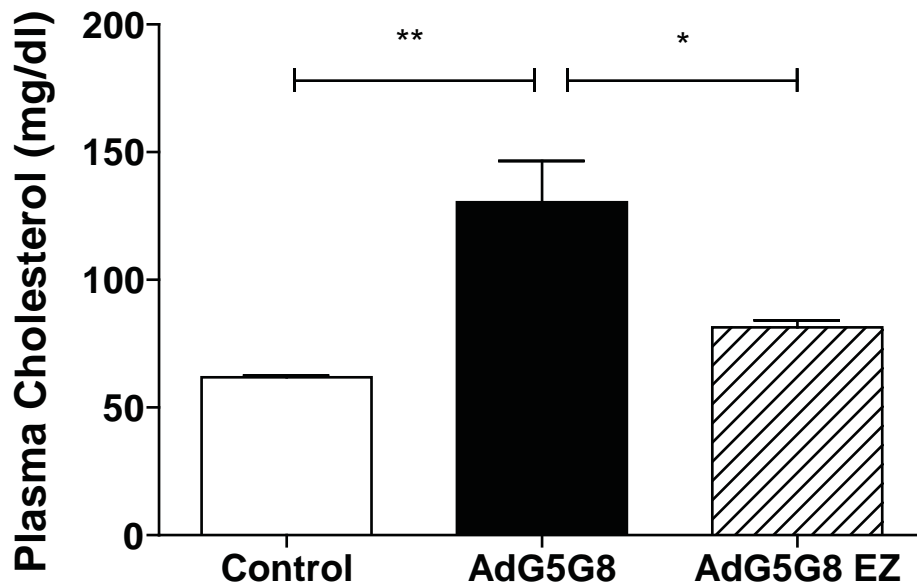

Fig SIV. Ezetimibe (EZ) blocks AdG5G8 induced hypercholesterolemia. Lean, C57BL6/J mice were injected with control virus or AdG5G8. Plasma cholesterol was determined 72 hr following viral administration. The AdG5G8 EZ group was pretreated with EZ (0.005% w/w in chow diet) for 3 days prior to viral administration and maintained on this diet until termination of the experiment. Data are mean  $\pm$  SEM (n=4) and were analyzed by 1-way ANOVA followed by Bonferroni post-hoc tests \*  $p < 0.05$ , \*\* $p < 0.01$

## Supplemental Figure V

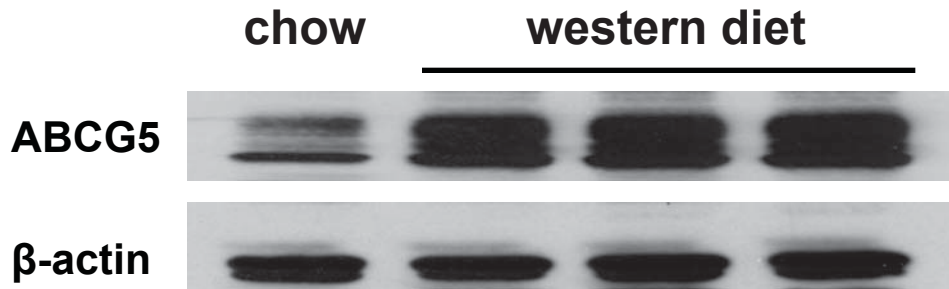

Fig SV. Hepatic membrane proteins (50  $\mu$ g) from LDL receptor deficient mice maintained on a chow or western diet for 16 weeks were isolated and subjected to SDS-PAGE and immunoblot analysis for G5.  $\beta$ -actin was used as a loading control.

## Supplemental Figure VI

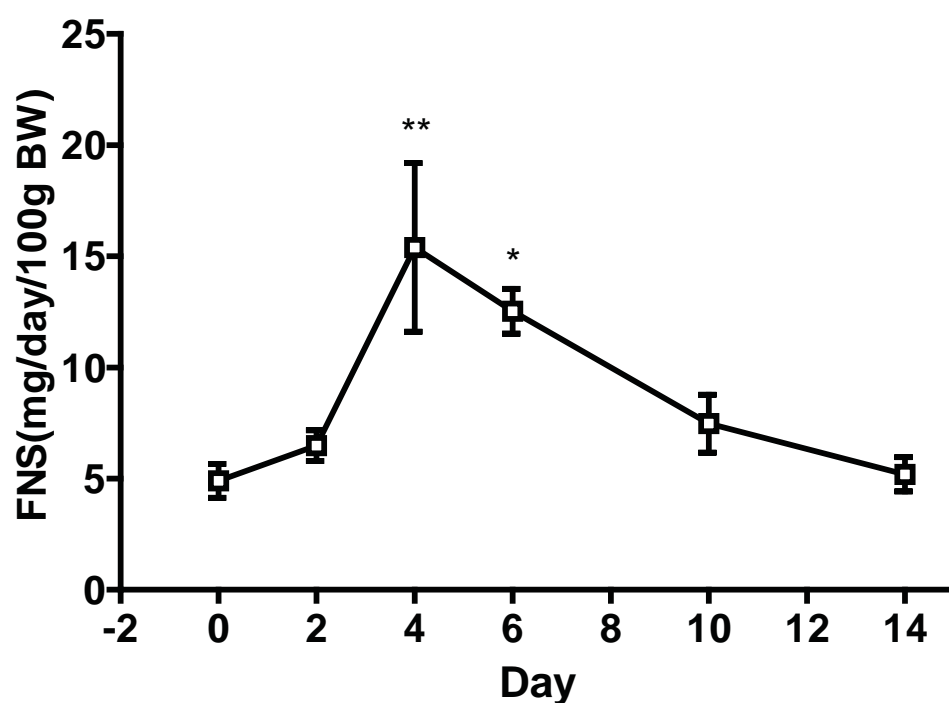

Fig SVI. C57 mice were individually housed in clean cages and feces collected for 48 hr (Day 0). AdG5G8 was administered on Day 0 and feces collected on day 2, 4, 6, 10 and 14. Feces were dried, lipids extracted and analyzed by GC/MS. Daily fecal output was calculated and normalized to body weight. Data are mean  $\pm$  SEM (n=3) and were analyzed by 1-Way repeated measures ANOVA. Dunnett's multiple comparison tests were used to determine differences from pretreatment fecal neutral sterol output (Day 0).
